# Supplementary material for: Extract2Chip—Bypassing Protein Purification in Drug Discovery Using Surface Plasmon Resonance
Source: MDPI journal article supplement (doi:10.3390/bios13100913), 2023-10-05
Supplement: s1 [file s1]

# Extract2Chip – Bypassing Protein Purification in Drug Discovery Using Surface Plasmon Resonance

Ana C. F. Paiva <sup>1,2</sup>, Ana R. Lemos <sup>1,2</sup>, Philipp Busse <sup>1,2</sup>, Madalena T. Martins <sup>1,†</sup>, Diana O. Silva <sup>1,2</sup>, Micael C. Freitas <sup>1,2</sup>, Sandra P. Santos <sup>1,2</sup>, Filipe Freire <sup>1,2</sup>, Evelyne J. Barrey <sup>3,‡</sup>, Xavier Manival <sup>4</sup>, Lisa Koetzner <sup>3</sup>, Timo Heinrich <sup>3</sup>, Ansgar Wegener <sup>3</sup>, Ulrich Grädler <sup>3</sup>, Tiago M. Bandejas <sup>1,2</sup>, Daniel Schwarz <sup>3,\*</sup> and Pedro M. F. Sousa <sup>1,2,\*</sup>

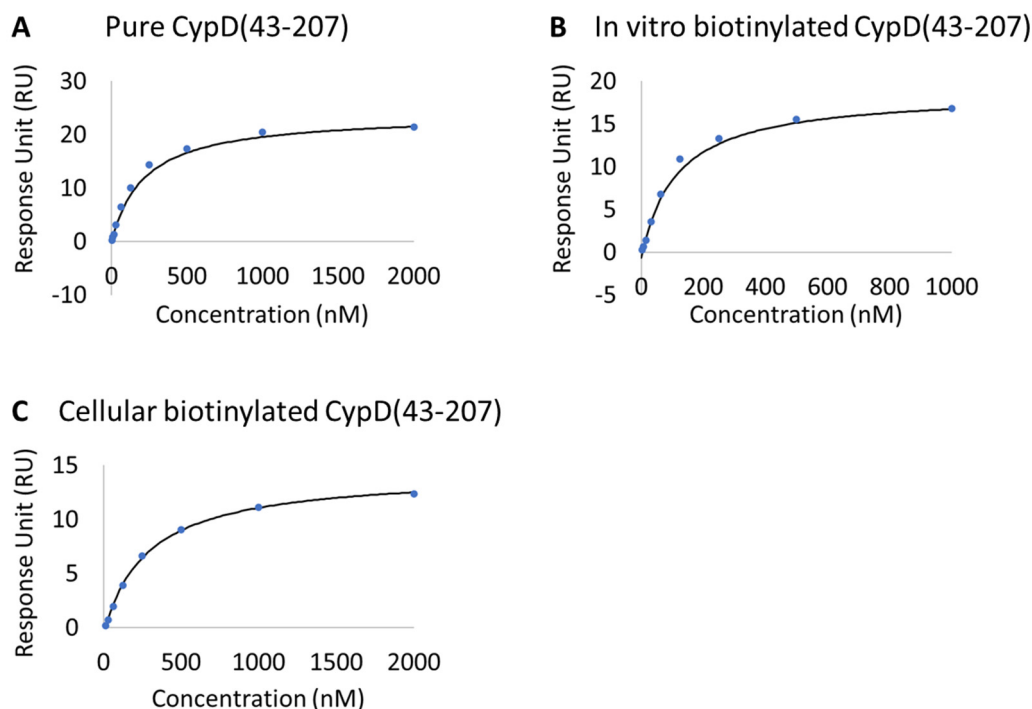

**Figure S1.** Steady-state affinity fit (KDss) for the interaction between pure (A), in vitro biotinylated (B) or cellular biotinylated (C) CypD(43-207) and a known inhibitor (CYPD-27). X-axis: concentration of CYPD-27 (nM); Y-axis: response unit (RU).

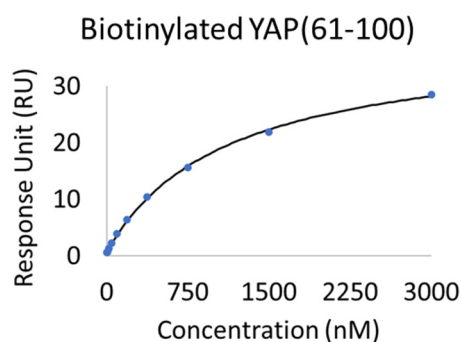

**Figure S2.** Steady-state affinity fit (KDss) for the interaction between biotinylated YAP(61-100) and TEAD1(209-436). X-axis: concentration of TEAD1 (nM); Y-axis: response unit (RU).

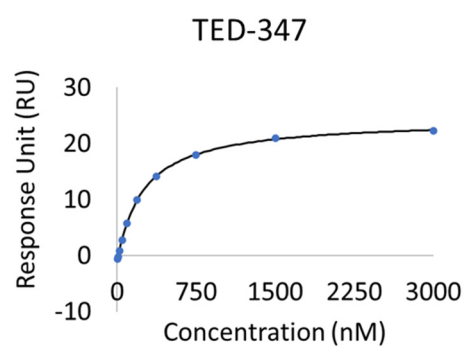

**Figure S3.** Steady-state affinity fit (KDss) for the interaction between biotinylated YAP(61-100) and TEAD1(209-436) in running buffer supplemented with 30  $\mu$ M TED-347. X-axis: concentration of TEAD1 (nM); Y-axis: response unit (RU).
